# Supplementary material
Source: PubMed Central journal article supplement (PMC4502814)
Supplement: kaup-11-03-1017189-s001.pdf [file kaup-11-03-1017189-s001.pdf]

A

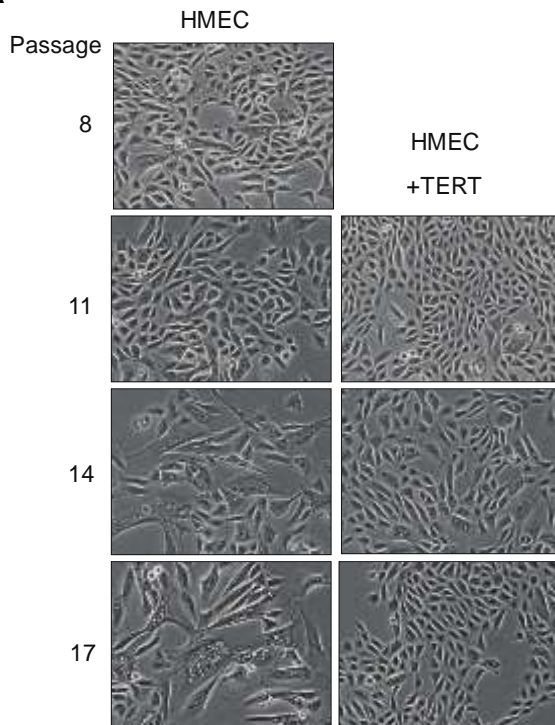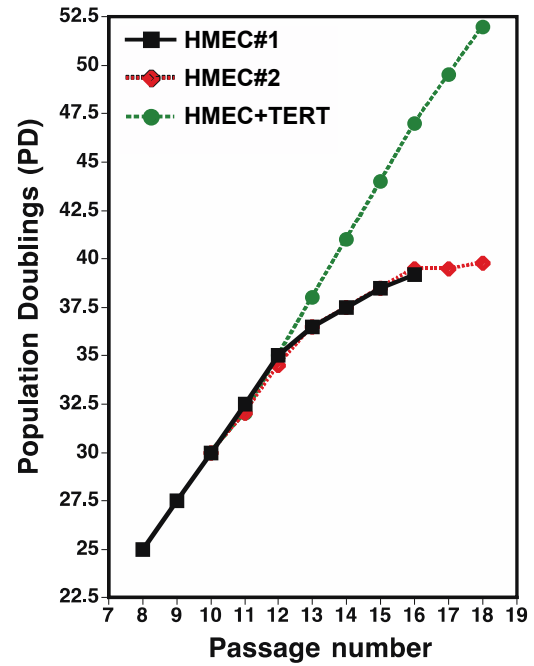

B

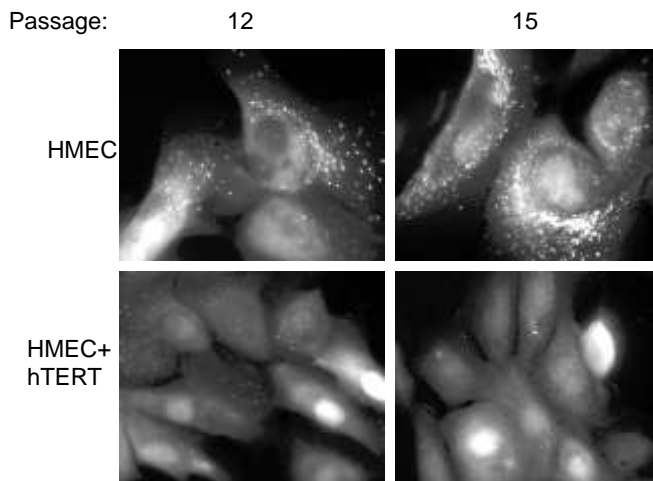

1

2 **Figure S1.** Punctate GFP-LC3B during HMEC agonescence. (A) Representative  
3 images and growth curve of HMEC or HMEC-TERT cultures at the indicated passages  
4 during extended culture. (B) GFP-LC3B puncta in HMEC and HMEC-TERT cells at the  
5 indicated passages.

A

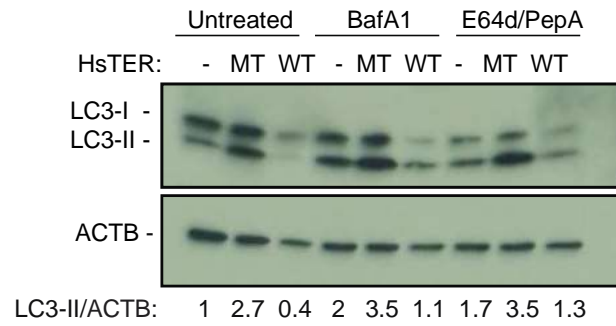

6

7 **Figure S2.** Autophagic flux is induced in response to MT-HsTER compared to vector or  
8 WT-HsTER. Immunoblot for LC3 in cells treated with WT or MT-HsTER either in the  
9 presence or absence of the lysosomal inhibitors bafilomycin A<sub>1</sub>, or E64d and pepstatin

10 A.

11

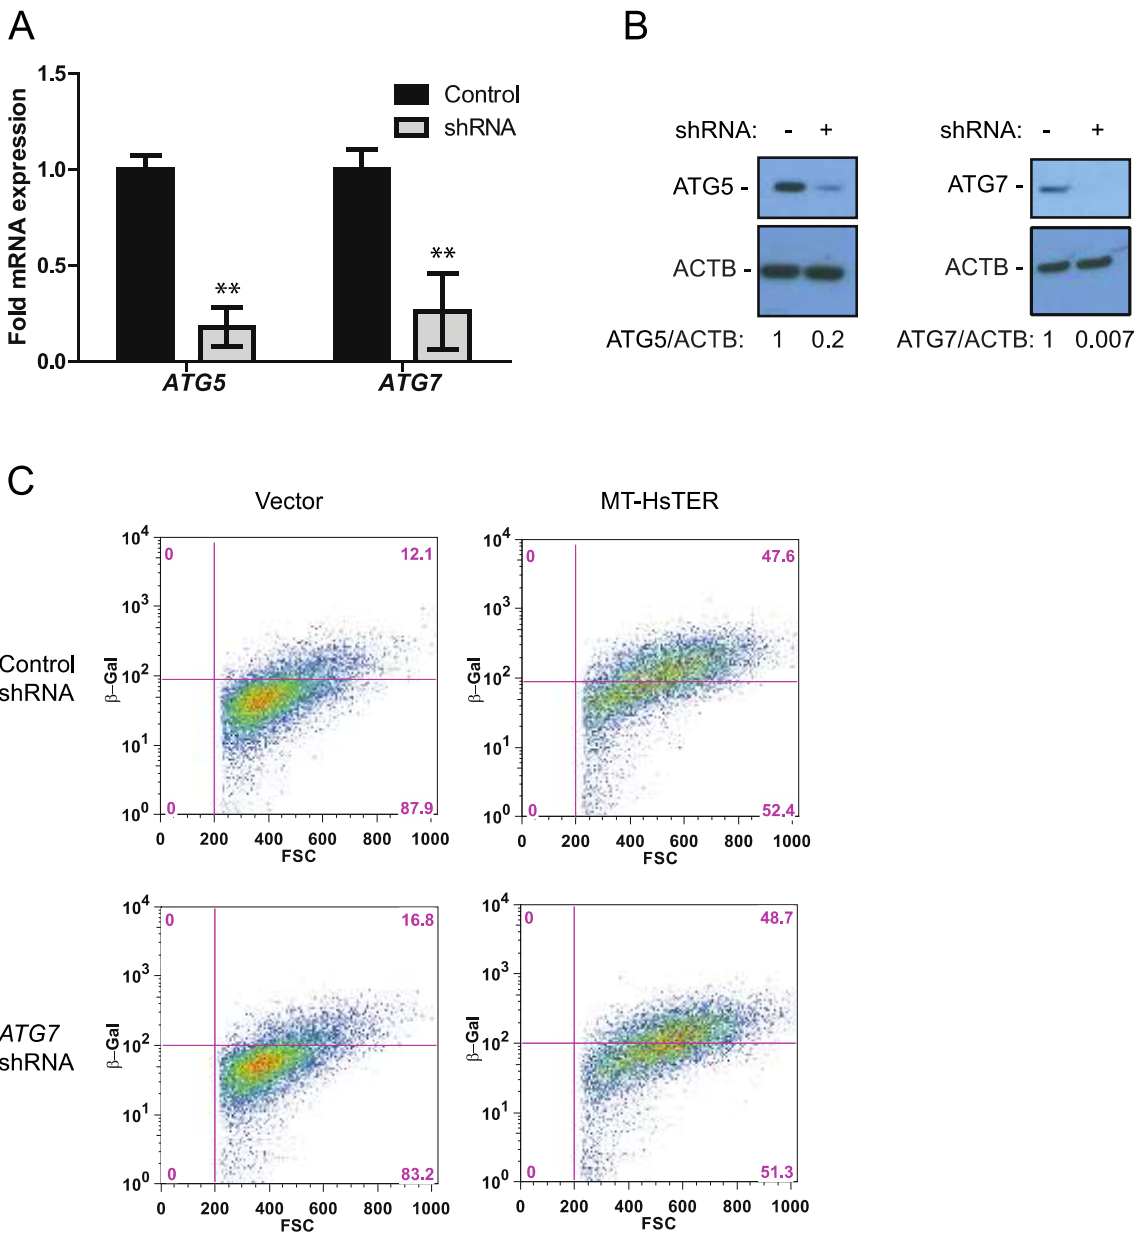

12

13 **Figure S3.** Autophagy inhibition does not affect MT-HsTER-induced senescence in WI-

14 38 fibroblasts. **(A)** Levels of *ATG5* and *ATG7* mRNA knockdown relative to control

15 shRNA. **(B)** Immunoblot for *ATG5* and *ATG7* upon shRNA knockdown. **(C)** SA-β-Gal

16 staining in autophagy proficient (control shRNA) or autophagy deficient (*ATG7* shRNA)

17 WI-38 fibroblasts assayed by flow cytometry. Numbers indicate percent of cells

18 occupying the indicated quadrant. SA-β-Gal-positive cells are located in the top right

19 quadrant. \*\*indicates significance at  $P < 0.01$ . Error bars indicate standard deviation.

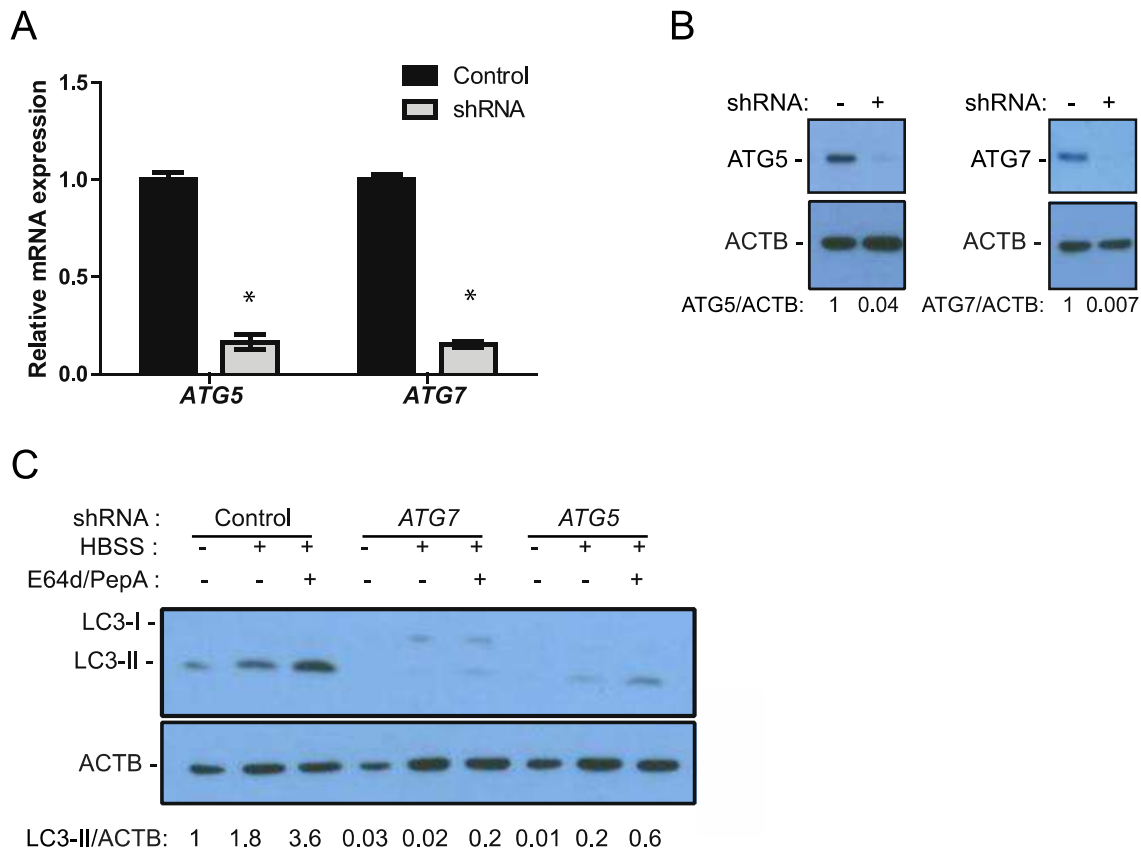

20

21 **Figure S4.** shRNA-mediated *ATG* silencing in BJ fibroblasts. **(A)** Levels of *ATG5* and  
 22 *ATG7* mRNA knockdown relative to control shRNA. **(B)** Immunoblot for *ATG5* and  
 23 *ATG7* upon shRNA knockdown. **(C)** Immunoblot for LC3 in autophagy-proficient  
 24 (Control shRNA) or autophagy-deficient (*ATG5* or *ATG7* shRNA) BJ fibroblasts upon  
 25 nutrient starvation in the presence or absence of the lysosomal inhibitors E64d and  
 26 pepstatin A. \*indicates significance at  $P < 0.05$ . Error bars indicate standard deviation.
